# Supplementary material for: Bacteriophage Combinations Significantly Reduce Clostridium difficile Growth In Vitro and Proliferation In Vivo
Source: PubMed Central journal article supplement (PMC4750681; doi:10.1128/aac.01774-15), 2016-01-29
Supplement: AAC.01774-15_zac002164838so1.pdf [file AAC.01774-15_zac002164838so1.pdf]

## SUPPLEMENTARY MATERIALS

**Table S 1** Accession numbers of all phage sequences examined in this study

| Name             | Phage morphology     | Accession numbers |
|------------------|----------------------|-------------------|
| <b>phiCDHM14</b> | Small myovirus       | LK985321          |
| <b>phiCDHM11</b> | Small myovirus       | HG798901          |
| <b>phiCDHM13</b> | Small myovirus       | HG796225          |
| <b>phiMMP04</b>  | Small myovirus       | NC_019422.1       |
| <b>phiCDHM1*</b> | Medium myovirus      | HG531805          |
| <b>phiCDHM3*</b> | Medium myovirus      | LN680004          |
| <b>phiC2</b>     | Medium myovirus      | NC_009231.1       |
| <b>phiCD119</b>  | Medium myovirus      | NC_007917.1       |
| <b>phiCDHM19</b> | Medium myovirus      | LK985322          |
| <b>phiCDHM2*</b> | Long tailed myovirus | LN680003          |
| <b>phiCDHM4*</b> | Long tailed myovirus | LN680005          |
| <b>phiCDHM5*</b> | Long tailed myovirus | LN680006          |
| <b>phiCDHM6*</b> | Long tailed myovirus | LN680007          |
| <b>phiCD27</b>   | Long tailed myovirus | NC_011398.1       |
| <b>phiMMP02</b>  | Long tailed myovirus | NC_019421.1       |
| <b>phiCDHS1*</b> | Siphovirus           | LN680008          |
| <b>phiCD38-2</b> | Siphovirus           | NC_015568.1       |
| <b>phiCD6356</b> | Siphovirus           | NC_015262.1       |

\*phages tested in this study.

**Table S 2 Analysis of manufacturing hosts for the expression of lysogenic phages**

| <b>Manufacturing host</b> | <b>Morphology of prophage</b> | <b>Prophage inducing agent</b> | <b>TEM image of prophage</b>                                                         |
|---------------------------|-------------------------------|--------------------------------|--------------------------------------------------------------------------------------|
| <b>1</b> CD105HE1         | Myovirus                      | Mitomycin C/Norfloxacin        | 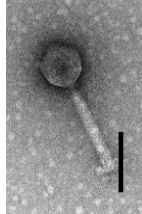  |
| <b>2</b> CD105LC1         | Defective myovirus            | Mitomycin C                    |   |
| <b>3</b> CD105HS1         | Phage tail-like particle      | Mitomycin C/Norfloxacin        |  |

Mid-log phase cultures of bacteria were treated with prophage inducing agents, mitomycin C or norfloxacin (3  $\mu$ l/ml) to mediate prophage release. Phages present were analyzed using transmission electron microscopy. Bar ~100 nm.

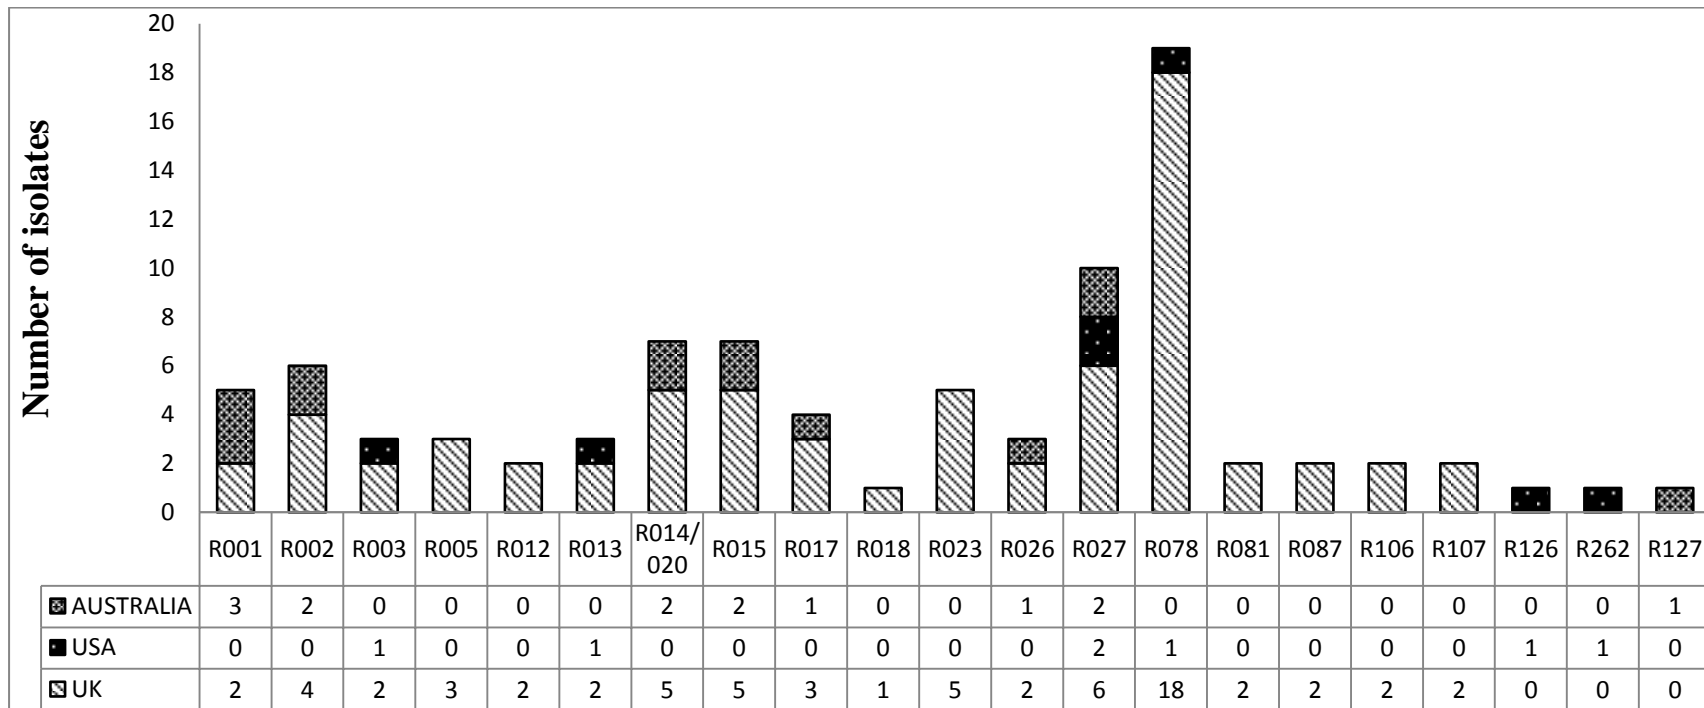

**Figure S 1 Number of ribotype isolates obtained from the different countries.**

Distribution of the 80 *C. difficile* isolates representing 21 clinically relevant ribotypes obtained from the UK, USA and Australia. The proportions of isolates from each ribotype and country are represented.

**Table S 3 Host range analysis of the phages examined in this study**

| Ribotypes | Bacterial isolates | Phages   |          |          |          |          |          |          |
|-----------|--------------------|----------|----------|----------|----------|----------|----------|----------|
|           |                    | phiCDHM1 | phiCDHM2 | phiCDHM3 | phiCDHM4 | phiCDHM5 | phiCDHM6 | phiCDHS1 |
| 001       | AUS1025            |          |          |          |          |          |          |          |
|           | AUS1021            |          |          |          |          |          |          |          |
|           | AUSCD84            |          |          |          |          |          |          |          |
|           | AIP                |          |          |          |          |          |          |          |
|           | CD001              |          |          |          |          |          |          |          |
| 002       | AUS1033            |          |          |          |          |          |          |          |
|           | AUS1036            |          |          |          |          |          |          |          |
|           | AIL                |          |          |          |          |          |          |          |
|           | AIJ                |          |          |          |          |          |          |          |
|           | TL178              |          |          |          |          |          |          |          |
|           | ATH                |          |          |          |          |          |          |          |
| 003       | LEEDS003           |          |          |          |          |          |          |          |
|           | AQV                |          |          |          |          |          |          |          |
|           | 2007831            |          |          |          |          |          |          |          |
| 005       | AUE                |          |          |          |          |          |          |          |
|           | AOY                |          |          |          |          |          |          |          |
|           | AOO                |          |          |          |          |          |          |          |
| 012       | CD630              |          |          |          |          |          |          |          |
|           | 10                 |          |          |          |          |          |          |          |
| 013       | ASA                |          |          |          |          |          |          |          |
|           | AKR                |          |          |          |          |          |          |          |
|           | ARS                |          |          |          |          |          |          |          |
| 014/020   | ATJ                |          |          |          |          |          |          |          |
|           | CD105LC2           |          |          |          |          |          |          |          |
|           | ATK                |          |          |          |          |          |          |          |
|           | TL176              |          |          |          |          |          |          |          |
|           | AUS1022            |          |          |          |          |          |          |          |
|           | CD66               |          |          |          |          |          |          |          |
|           | ANS                |          |          |          |          |          |          |          |
| 015       | TL174              |          |          |          |          |          |          |          |
|           | ALV                |          |          |          |          |          |          |          |
|           | ATO                |          |          |          |          |          |          |          |
|           | ATU                |          |          |          |          |          |          |          |
|           | ATR                |          |          |          |          |          |          |          |
|           | CD89               |          |          |          |          |          |          |          |
|           | CD81               |          |          |          |          |          |          |          |
| 017       | AUS1023            |          |          |          |          |          |          |          |
|           | CF5                |          |          |          |          |          |          |          |
|           | M68                |          |          |          |          |          |          |          |
|           | LEEDS017           |          |          |          |          |          |          |          |
| 018       | LEEDS018           |          |          |          |          |          |          |          |
| 023       | CD305              |          |          |          |          |          |          |          |
|           | UK023              |          |          |          |          |          |          |          |
|           | AKL                |          |          |          |          |          |          |          |
|           | AJX                |          |          |          |          |          |          |          |
|           | LEEDS023           |          |          |          |          |          |          |          |
| 026       | AUS1028            |          |          |          |          |          |          |          |
|           | ALN                |          |          |          |          |          |          |          |
|           | AUB                |          |          |          |          |          |          |          |

**Table S 3 continue**

| Ribotypes                                      | Bacterial isolates | Phages    |           |           |          |           |           |           |
|------------------------------------------------|--------------------|-----------|-----------|-----------|----------|-----------|-----------|-----------|
|                                                |                    | phiCDHM1  | phiCDHM2  | phiCDHM3  | phiCDHM4 | phiCDHM5  | phiCDHM6  | phiCDHS1  |
| 027                                            | AUS1032            |           |           |           |          |           |           |           |
|                                                | AUS1024            |           |           |           |          |           |           |           |
|                                                | CD196              |           |           |           |          |           |           |           |
|                                                | R20291             |           |           |           |          |           |           |           |
|                                                | B19                |           |           |           |          |           |           |           |
|                                                | AJS                |           |           |           |          |           |           |           |
|                                                | AJV                |           |           |           |          |           |           |           |
|                                                | AMJ                |           |           |           |          |           |           |           |
|                                                | AMZ                |           |           |           |          |           |           |           |
|                                                | ANB                |           |           |           |          |           |           |           |
|                                                | US027              |           |           |           |          |           |           |           |
|                                                | 2006237            |           |           |           |          |           |           |           |
| 078                                            | M120               |           |           |           |          |           |           |           |
|                                                | ATM                |           |           |           |          |           |           |           |
|                                                | AKM                |           |           |           |          |           |           |           |
|                                                | AKP                |           |           |           |          |           |           |           |
|                                                | ALL                |           |           |           |          |           |           |           |
|                                                | ARS                |           |           |           |          |           |           |           |
|                                                | AML                |           |           |           |          |           |           |           |
|                                                | 5361               |           |           |           |          |           |           |           |
| 081                                            | ANO                |           |           |           |          |           |           |           |
|                                                | ANQ                |           |           |           |          |           |           |           |
| 087                                            | APX                |           |           |           |          |           |           |           |
|                                                | APT                |           |           |           |          |           |           |           |
| 106                                            | CD106              |           |           |           |          |           |           |           |
|                                                | LV22               |           |           |           |          |           |           |           |
| 107                                            | ASV                |           |           |           |          |           |           |           |
|                                                | ASQ                |           |           |           |          |           |           |           |
| 126                                            | 2005093            |           |           |           |          |           |           |           |
| 127                                            | M322630            |           |           |           |          |           |           |           |
| 262                                            | 2007827            |           |           |           |          |           |           |           |
| <b>Total number of ribotypes = 21</b>          |                    | <b>7</b>  | <b>9</b>  | <b>12</b> | <b>4</b> | <b>10</b> | <b>9</b>  | <b>11</b> |
| <b>Total number of bacterial isolates = 80</b> |                    | <b>16</b> | <b>22</b> | <b>31</b> | <b>4</b> | <b>20</b> | <b>23</b> | <b>30</b> |

Host range analysis was conducted by applying 10 µl of 10<sup>8</sup> PFU/ml of phage stocks on lawns of bacteria and incubated anaerobically at 37 °C for 18-24 h. Key: Red cells= clears, Purple cells =turbid clearing, white cells = no clearing, Grey cells=UK strains, Blue cells = Australian strains and Green cells= US strains.

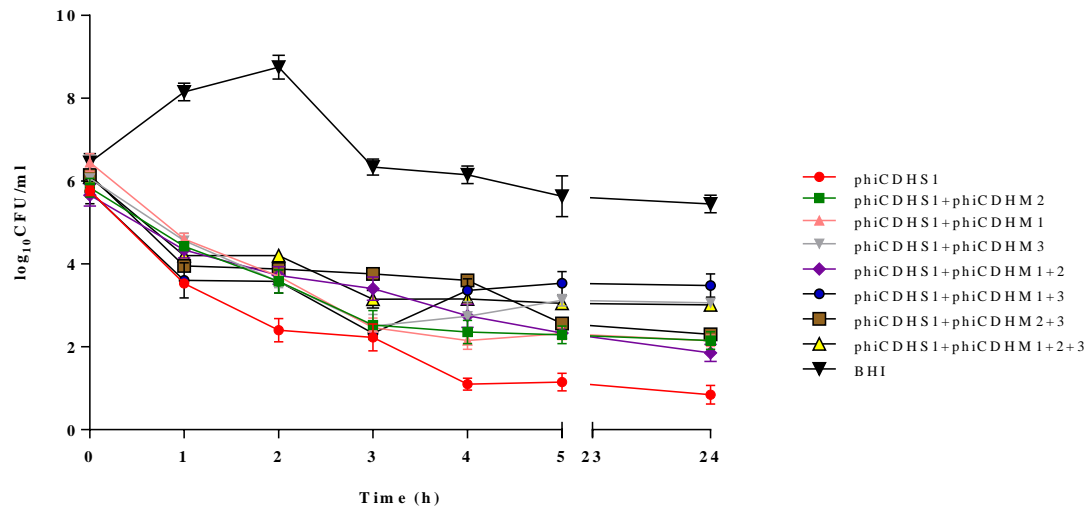

**Figure S 2. Number of viable *C. difficile* R20291 following treatment with phage combinations.**

Phage treatments of *C. difficile* R20291 cultures with various phage combinations are shown. Enumeration of viable bacteria in the treated and untreated cultures at the different time points was determined on BHI agar plates. Error bars represent standard error of mean (SEM) of three replicates.

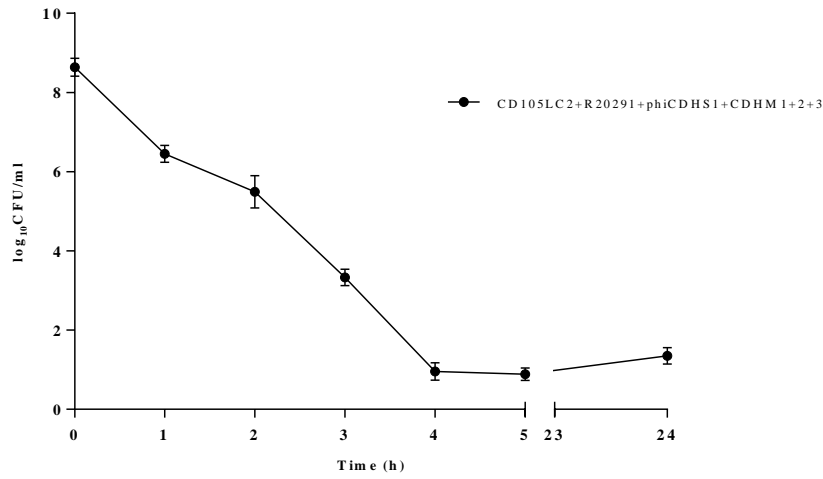

**Figure S 3 Infection of R20291 and CD105LC2 cultures with phiCDHS1+phiCDHM1+2+3.**

Total viable bacterial counts in the phage-treated culture medium at different time points were determined on BHI agar. Error bars represent standard error of mean (SEM) of three replicates.

**Table S 4 Times to temperature drop of 35°C and humane endpoint cull for hamsters infected with different strains of *C. difficile*.**

| <b>Strain tested</b>                 | <b>Ribotype</b> | <b>No of animals tested</b> | <b>Average time to 35°C temp drop</b> | <b>Range</b>           |
|--------------------------------------|-----------------|-----------------------------|---------------------------------------|------------------------|
| <b>R20291</b>                        | RT027           | 11                          | 46 h 42 m                             | 36 h - 62h 18 m        |
| <b>CD630 <math>\Delta</math>ermB</b> | RT012           | 6                           | 53h 39 m                              | 34 h 54 m – 67 h 36 m  |
| <b>CD105HE1</b>                      | RT076           | 6                           | 55 h 31 m                             | 52 h 3 min - 58 h 20 m |

These infections were initiated 5 days post treatment with clindamycin as all strains show sensitivity to clindamycin used to modify gut flora.



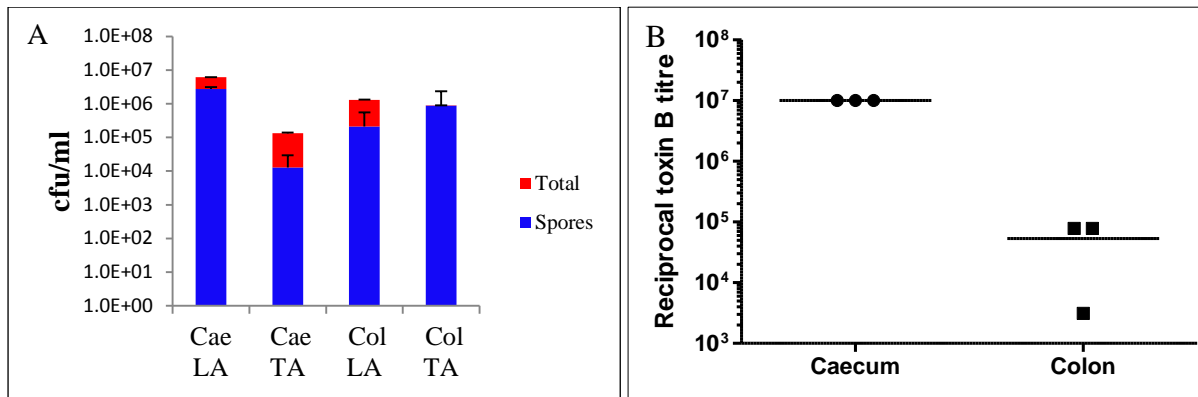

**Figure S 4 Levels of CD105HE1 colonization and toxins at experimental endpoint in hamsters treated with the bacteria alone**

**A, Recoveries of CD105HE1 at experimental endpoint from hamsters.** The caecum (Cae) and colon (Col) of each animal was opened longitudinally and washed thoroughly to remove the luminal associated organisms (LA). The tissue was then homogenized to allow quantification of tissue associated (TA) organisms. Levels of colonization were determined before and post heat treatment (56°C for 20 min) to allow discrimination of total (red bars) or spore counts (blue bars) respectively. Error bars represent the standard error of mean bacterial recoveries from six animals. **B, Assessment of Toxin B levels in filtered gut extracts from hamsters at experimental endpoint.** Diluted filtered contents from the caecum and colon of infected animals were applied to confluent wells of Vero cells and activity of the toxin determined 24h later. The reciprocal of the first dilution that showed < 50% cell rounding was recorded as activity. Values shown reflect a single experimental evaluation of 3 of the 6 animals tested.

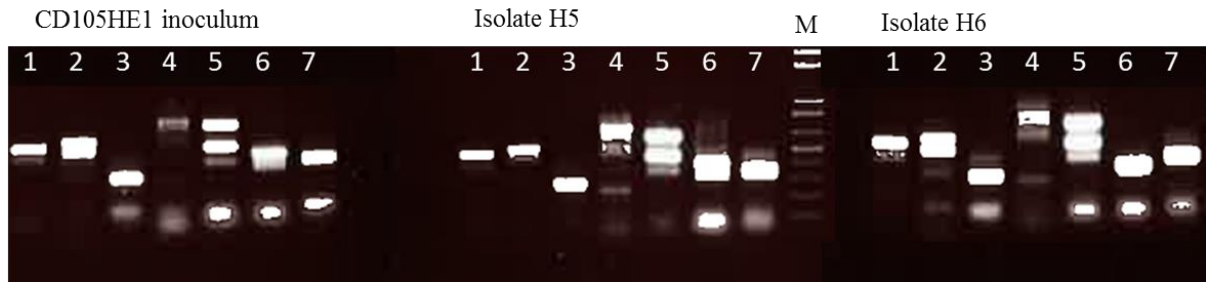

**Figure S 5 Confirmation that *C. difficile* recovered from phage treated hamsters was CD105HE1.**

Analysis is based on the use of seven primers directed toward multilocus variable-number tandem-repeats sequences (MLVA)<sup>70</sup> to amplify specific sequences from DNA recovered from organisms used to challenge animals and for colonies recovered from the caecum and colons of treated animals. Two representative isolates from two H5 and H6, challenged with CD105HE1 and treated with phage cocktail are shown here. M is 1 kb Plus DNA ladder (Invitrogen, USA).
